# Supplementary material
Source: HighWire-hosted journal article supplement (https://spcare.bmj.com/content/11/4/351)
Supplement: inline-supplementary-material-1 [file inline-supplementary-material-1.pdf]

## Appendix I. Search Strategy PubMed

((Palliative care[mh] OR end-of-life care[tiab] OR supportive care[tiab] OR comfort care[tiab] OR Terminal care[mh:noexp] OR terminal care[tiab] OR Terminally ill care[mh] OR advanced cancer care[tiab] OR advanced disease care[tiab]) AND (hospitals[mh] OR hospitals[tiab] OR tertiary care centers[mh] OR secondary care centers[mh] OR general hospitals[mh] OR Hospital Departments[mh] OR Subacute Care[mh] OR Intensive Care Units[mh] OR Critical Care[mh]) OR (team OR teams) AND (effect\* OR evaluat\* OR benefit\* OR impact\* OR impacts\*)) – Limits: (Hospices[mh] OR hospice\*[tiab] OR Hospice Care[mh]).
